# Supplementary material for: Highly hydroxylated hafnium clusters are accessible to high resolution EUV photoresists under small energy doses
Source: PubMed Central journal article supplement (PMC10729921; doi:10.1039/d3na00508a), 2023-11-10
Supplement: NA-006-D3NA00508A-s001.pdf [file NA-006-D3NA00508A-s001.pdf]

## *Supporting Information*

### **Highly Hydroxylated Hafnium Clusters Are Accessible to High Resolution EUV Photoresists under Small Energy Doses**

Yu-Fang Tseng,<sup>a</sup> Pin-Chia Liao, Po-Hsiung Chen<sup>\*b,c</sup> Tsi-Sheng Gau,<sup>\*b,c</sup> Burn-Jeng Lin,<sup>b,c</sup> Po-Wen Chiu<sup>b,c</sup> and Jui-Hsiung Liu<sup>\*a</sup>

**KEYWORDS:** Hexameric Hf oxide clusters, partially decarboxylation, photoresist, EUV lithography, line/space/edge character.

<sup>a</sup>Department of Chemistry,

<sup>b</sup>TSMC-NTHU Joint Research Center

<sup>c</sup>Department of Electric Engineering, National Tsing-Hua University, Hsinchu, Taiwan, ROC, email: rslu@mx.nthu.edu.tw

#### **Content:**

1. Representative Synthetic procedures ----- 1
2. SEM images E-beam lithography patterns ----- 2
3. SEM images EUV lithography patterns ----- 4
4. Spectral data of key compounds -----6
5. <sup>1</sup>H and <sup>13</sup>C NMR of key compounds ----- 7

## **1. Representative synthetic procedures**

Unless otherwise noted, all reactions were carried out under nitrogen atmosphere in oven-dried glassware using standard syringe, cannula and septa apparatus. Dichloromethane and toluene were dried over  $\text{CaH}_2$  and distilled. Reagents were purchased from commercial sources and used without purification, unless otherwise stated.  $^1\text{H}$  NMR and  $^{13}\text{C}$  NMR spectra were recorded on a Bruker 400 MHz and Bruker 500 MHz spectrometers using chloroform-d ( $\text{CDCl}_3$ ) as the internal standard. The ESI-Mass were performed using JEOL JMS-700. The EA analysis was performed by elemental vario EL cube. The TGA were performed using Mettler-Toledo 2-HT. FTIR Spectroscopy of powder samples was in a Bruker Vertex 80v spectrometer. The AFM measurements were using SEIKO SPA-300HV. Electron-beam lithography was done by utilizing Elionix ELS-7800 with an accelerating voltage of 80 kV and a beam current of 200 pA. The EUV-IL system at the Swiss Light Sources (SLS), Paul Scherrer Institute, utilizes 13.5 nm EUV light. HRXPS measurements were performed in a ULVAC-PHI Quantera II, with a monochromatic Al K $\alpha$  source (energy of 1486.7 eV).

### 3. SEM image of E-beam lithography patterns

| Dose<br>Design HP    | 800 $\mu\text{C}/\text{cm}^2$                                                                     | 1120 $\mu\text{C}/\text{cm}^2$                                                                     |
|----------------------|---------------------------------------------------------------------------------------------------|----------------------------------------------------------------------------------------------------|
| Design<br>HP = 50 nm | HP = 50 nm<br>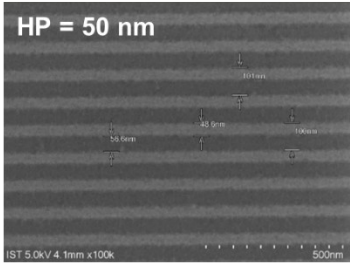   | HP = 50 nm<br>   |
| Design<br>HP = 40 nm | HP = 41 nm<br>   | HP = 39 nm<br>   |
| Design<br>HP = 30 nm | HP = 30 nm<br>  | HP = 31 nm<br>  |
| Design<br>HP = 20 nm | HP = 19 nm<br> | HP = 20 nm<br> |
| Design<br>HP = 15 nm |                |                |

**Figure S1.** SEM images of E-beam lithography patterns on **3**. Process parameter: 2 wt%, THK= 24 nm, Developer: 2-Heptanone : Hexane = 1 : 1 60 s, **no PEB**

| Dose<br>Design HP |                   | 800 $\mu\text{C}/\text{cm}^2$ | 1120 $\mu\text{C}/\text{cm}^2$ |
|-------------------|-------------------|-------------------------------|--------------------------------|
|                   |                   | Design HP = 50 nm             | <p>HP = 50 nm</p>              |
| Design HP = 40 nm | <p>HP = 39 nm</p> | <p>HP = 42 nm</p>             |                                |
| Design HP = 30 nm | <p>HP = 31 nm</p> | <p>HP = 29 nm</p>             |                                |
| Design HP = 20 nm |                   | <p>HP = 20 nm</p>             |                                |
| Design HP = 15 nm |                   |                               |                                |

**Figure S2.** SEM images of E-beam lithography patterns on **3**. Process parameter: 2 wt%, THK= 24 nm, Developer: 2-Heptanone : Hexane = 1 : 1 60 s, PEB= 80°C, 60s

#### 4. SEM image of EUV lithography patterns

| Dose<br>Design HP    | ~ 10 mJ/cm <sup>2</sup>                                                                                      | ~ 30 mJ/cm <sup>2</sup>                                                                                      |
|----------------------|--------------------------------------------------------------------------------------------------------------|--------------------------------------------------------------------------------------------------------------|
|                      | Design<br>HP = 50 nm                                                                                         | <p>HP = 52 nm (11 mJ/cm<sup>2</sup>)</p> <p>52.5 nm, 53.1 nm, 51.4 nm</p> <p>IST 5.0kV 3.4mm x100k 500nm</p> |
| Design<br>HP = 35 nm | <p>HP = 36 nm (10 mJ/cm<sup>2</sup>)</p> <p>35.9 nm, 35.0 nm, 34.4 nm</p> <p>IST 5.0kV 3.4mm x100k 500nm</p> | <p>HP = 34 nm (30 mJ/cm<sup>2</sup>)</p> <p>34.5 nm, 34.2 nm, 34.5 nm</p> <p>IST 5.0kV 3.3mm x100k 500nm</p> |
| Design<br>HP = 25 nm | <p>HP = 24 nm (9 mJ/cm<sup>2</sup>)</p> <p>24.2 nm, 24.8 nm, 24.2 nm</p> <p>IST 5.0kV 3.4mm x100k 500nm</p>  | <p>HP = 25 nm (27 mJ/cm<sup>2</sup>)</p> <p>25.0 nm, 25.2 nm, 25.1 nm</p> <p>IST 5.0kV 3.3mm x100k 500nm</p> |
| Design<br>HP = 22 nm | <p>HP = 21 nm (9 mJ/cm<sup>2</sup>)</p> <p>21.7 nm, 21.5 nm, 21.2 nm</p> <p>IST 5.0kV 3.4mm x100k 500nm</p>  | <p>HP = 22 nm (27 mJ/cm<sup>2</sup>)</p> <p>22.0 nm, 22.1 nm, 22.1 nm</p> <p>IST 5.0kV 3.3mm x100k 500nm</p> |
| Design<br>HP = 18 nm | <p>HP = 19 nm (10 mJ/cm<sup>2</sup>)</p> <p>19.2 nm, 19.2 nm, 19.4 nm</p> <p>IST 5.0kV 3.4mm x100k 500nm</p> | <p>HP = 18 nm (30 mJ/cm<sup>2</sup>)</p> <p>18.3 nm, 18.2 nm, 18.3 nm</p> <p>IST 5.0kV 3.3mm x100k 500nm</p> |

**Figure S3.** SEM images of EUV lithography patterns on **3** HP= 50, 35, 25, 22, 18 nm at different dose. Process parameter: 2.0 wt%, THK= 24 nm, Developer: 2-Heptanone : Hexane = 1 : 1 60 s, PEB= 80°C 60 s

| Dose<br>Design HP    | $\sim 90 \text{ mJ/cm}^2$ | $\sim 100 \text{ mJ/cm}^2$ |
|----------------------|---------------------------|----------------------------|
|                      | Design<br>HP = 50 nm      |                            |
| Design<br>HP = 35 nm |                           |                            |
| Design<br>HP = 25 nm |                           |                            |
| Design<br>HP = 22 nm |                           |                            |
| Design<br>HP = 18 nm |                           |                            |

**Figure S4.** SEM images of EUV lithography patterns on **3** HP= 50, 35, 25, 22, 18 nm at different dose. Process parameter: 2.0 wt%, THK= 24 nm, Developer: 2-Heptanone : Hexane = 1 : 1 60 s, PEB= 80°C 30 s

## 6. Spectral data of key compounds.

### 6.1 Spectral data for highly decarboxylated 6-Hafnium Cluster with 2-methylbutanoic acid ligand 3.

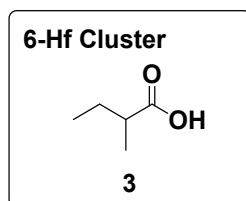

White solid (59%) ;  $^1\text{H NMR}$  (400 MHz,  $\text{CDCl}_3$ ) :  $\delta$  2.11 (s, 8H), 1.65 (s, 8H), 1.30 (s, 8H), 1.03 (s, 24H), 0.84 (s, 24H) ;  $^{13}\text{C NMR}$  (125 MHz,  $\text{CDCl}_3$ ) :  $\delta$  181.9, 42.8, 26.6, 16.2, 11.9. ; **EA Anal.** Calcd. for  $\text{C}_{40}\text{H}_{80}\text{O}_{28}\text{Hf}_6$  : C : 23.10% ; H : 3.88%, found : C : 23.11% ; H : 4.17

## 7. $^1\text{H}$ and $^{13}\text{C}$ NMR of cluster 3

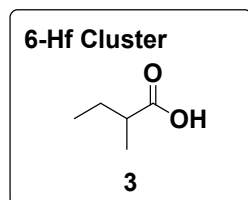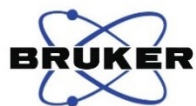

Current Data Parameters  
 NAME HI(2MBA)-st  
 EXPNO 1  
 PROCNO 1

F2 - Acquisition Parameters  
 Date\_ 20230418  
 Time 20.06  
 INSTRUM spect  
 PROBHD 5 mm DUL 13C-1  
 PULPROG zg30  
 TD 32768  
 SOLVENT CDC13  
 NS 19  
 DS 0  
 SWH 6410.256 Hz  
 FIDRES 0.195625 Hz  
 AQ 2.5559039 sec  
 RG 161  
 DW 78.000 usec  
 DE 6.00 usec  
 TE 300.0 K  
 D1 2.00000000 sec  
 TDO 1

===== CHANNEL f1 =====  
 NUC1  $^1\text{H}$   
 P1 10.00 usec  
 PL1 -2.40 dB  
 SFO1 400.1528010 MHz

F2 - Processing parameters  
 SI 16384  
 SF 400.1500175 MHz  
 WDW EM  
 SSB 0  
 LB 0 Hz  
 GB 0  
 PC 1.00

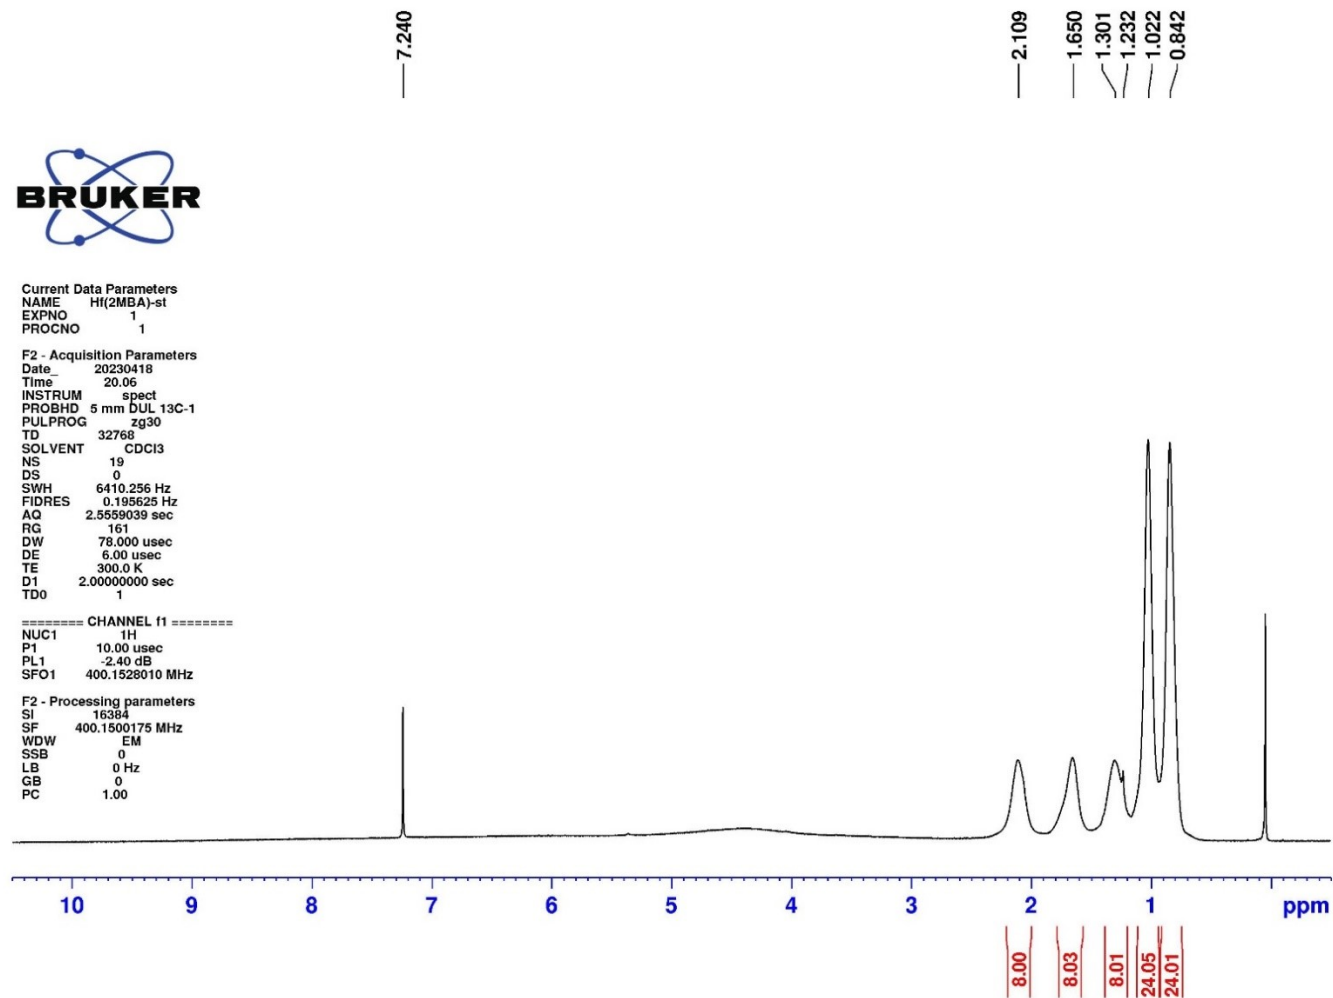

Figure S5.  $^1\text{H}$  NMR of cluster 3



6-Hf Cluster

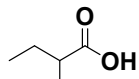

3

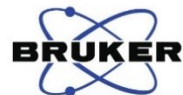

Current Data Parameters  
NAME flu220709\_002  
EXPNO 2  
PROCNO 1

F2 - Acquisition Parameters  
Date\_ 20220711  
Time\_ 1.51 h  
INSTRUM spect  
PROBHD Z119470\_0234 ( )  
PULPROG zgpg30  
TD 32768  
SOLVENT CDCl3  
NS 8000  
DS 0  
SWH 29761.904 Hz  
FIDRES 0.908261 Hz  
AQ 0.5505024 sec  
RG 191.01  
DW 16.800 usec  
DE 6.50 usec  
TE 300.3 K  
D1 2.0000000 sec  
D11 0.0300000 sec  
TD0 1  
SFO1 125.7785374 MHz  
NUC1 13C  
P1 10.00 usec  
PLW1 86.00000000 W  
SFO2 500.1620006 MHz  
NUC2 1H  
CPDPRG[2 bi\_waltz65\_256  
PCPD2 80.00 usec  
PLW2 29.50000000 W  
PLW12 0.46094000 W  
PLW13 0.23148000 W

F2 - Processing parameters  
SI 32768  
SF 125.7653329 MHz  
WDW EM  
SSB 0  
LB 3.00 Hz  
GB 0  
PC 1.00

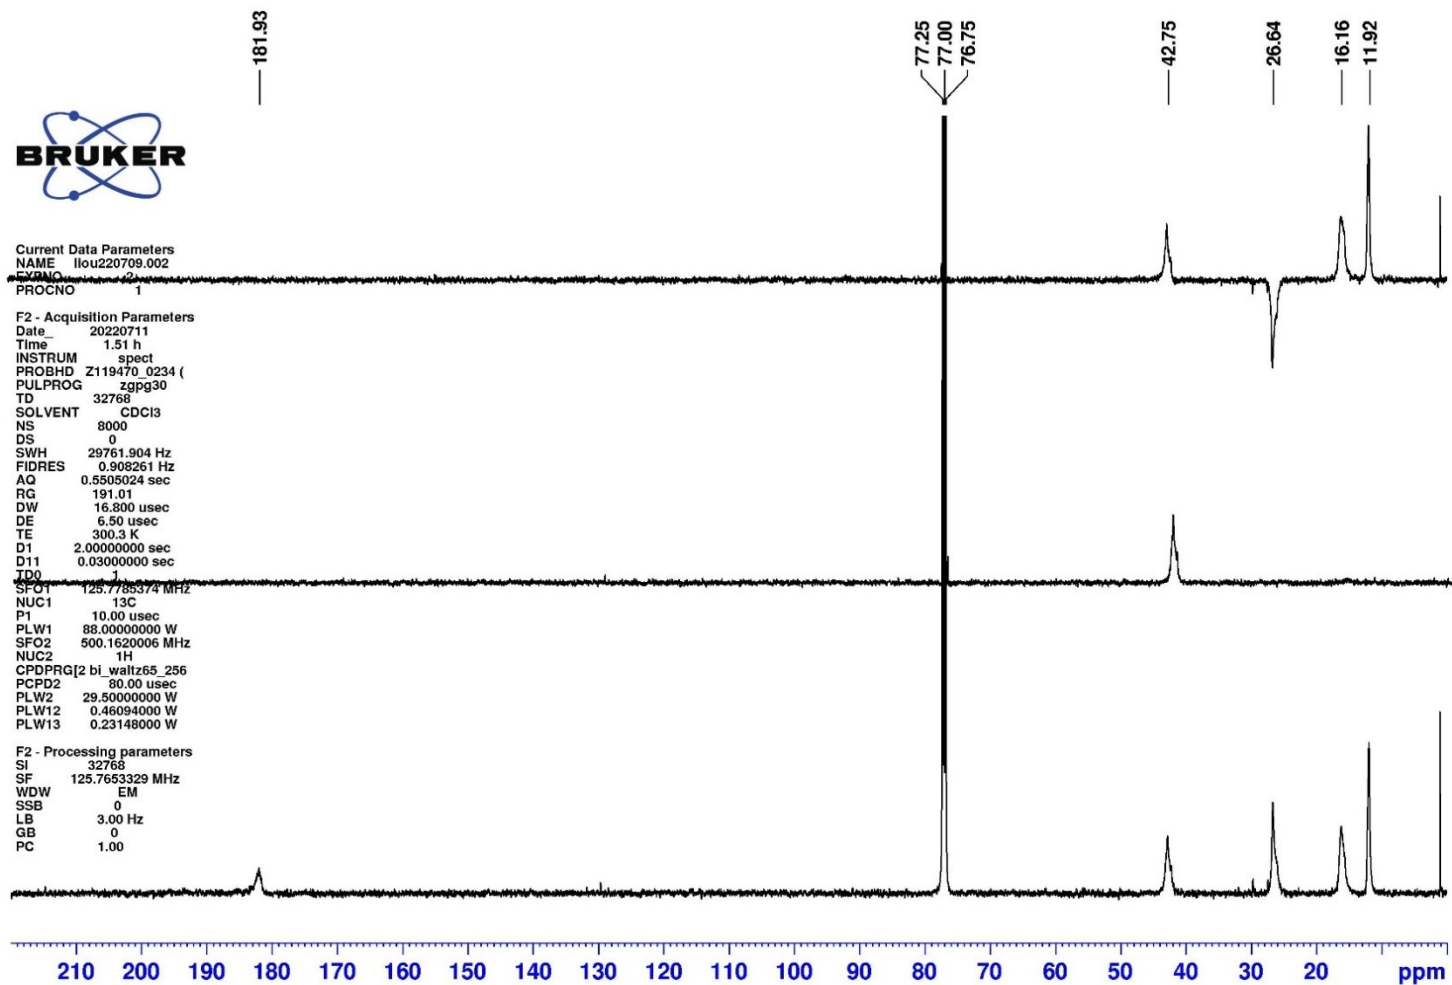

Figure S6. <sup>13</sup>C NMR of cluster 3

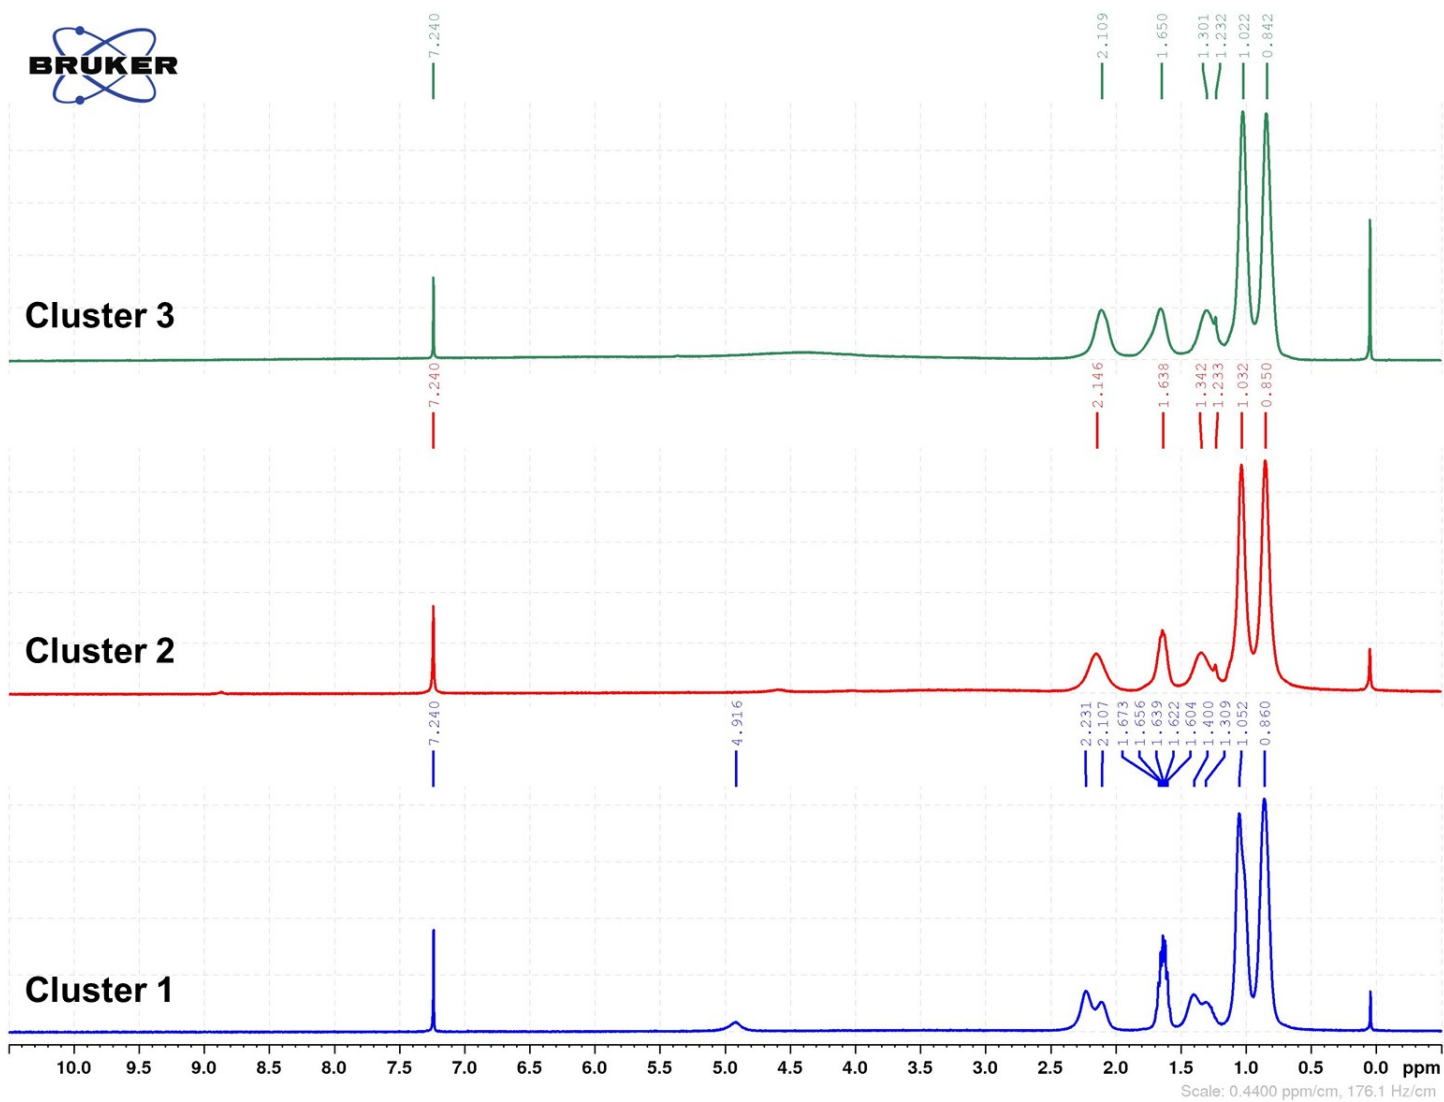

Figure S7.  $^1\text{H}$  NMR of cluster 1, 2 and 3
